# Supplementary material for: Fluorescent assay for acetylcholinesterase activity and inhibitor screening based on lanthanide organic/inorganic hybrid materials
Source: Royal Society of Chemistry journal article supplement (doi:10.1039/d3ay01925j), 2023-12-05
Supplement: d3ay01925j1.pdf [file d3ay01925j1.pdf]

## Supplementary Materials

### **Fluorescent Assay for Acetylcholinesterase Activity and Inhibitor Screening Based on the Lanthanide Organic/Inorganic Hybrid**

#### **Materials**

Bing Zhang <sup>1,2</sup>, Yu Wang <sup>1,2</sup>, Donghui Wu <sup>1,2</sup>, Qilin Zhao <sup>1,2</sup>, Yaoyao Chen <sup>1,2</sup>, Yushu Li <sup>3</sup>, Jian Sun <sup>1,3\*</sup>, Xiurong Yang <sup>1,2\*</sup>

<sup>1</sup>State Key Laboratory of Electroanalytical Chemistry, Changchun Institute of Applied Chemistry, Chinese Academy of Sciences, Changchun, Jilin 130022, China

<sup>2</sup>School of Applied Chemistry and Engineering, University of Science and Technology of China, Hefei, Anhui, 230026, China

<sup>3</sup>College of Pharmacy, Xinjiang Medical University, Urumqi, 830017, China.

\*Corresponding authors.

E-mail addresses: [jjiansun@ciac.ac.cn](mailto:jjiansun@ciac.ac.cn), [xryang@ciac.ac.cn](mailto:xryang@ciac.ac.cn).

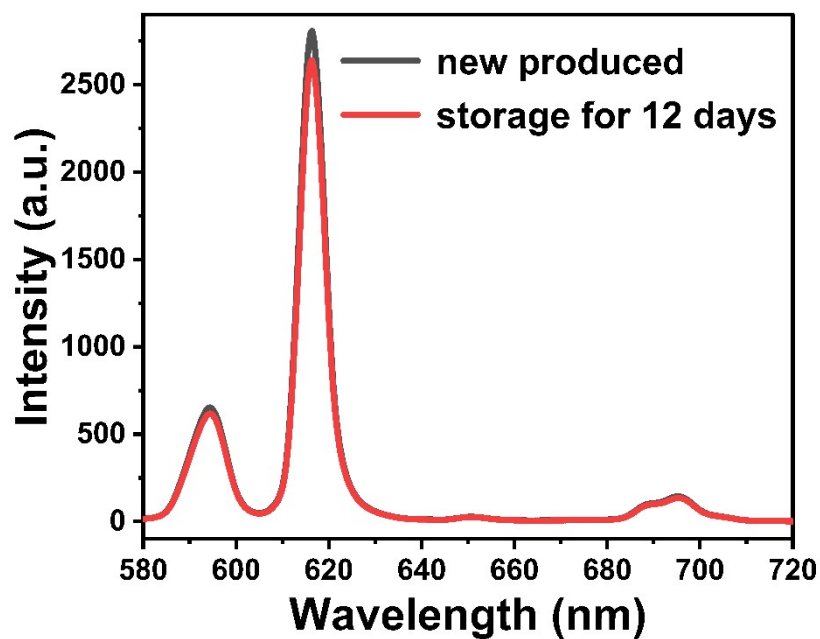

Fig.S1. Fluorescence emission spectrum of  $\text{Eu}(\text{DPA})_3@Lap$  new produced and storage in room temperature for 12 days, respectively.

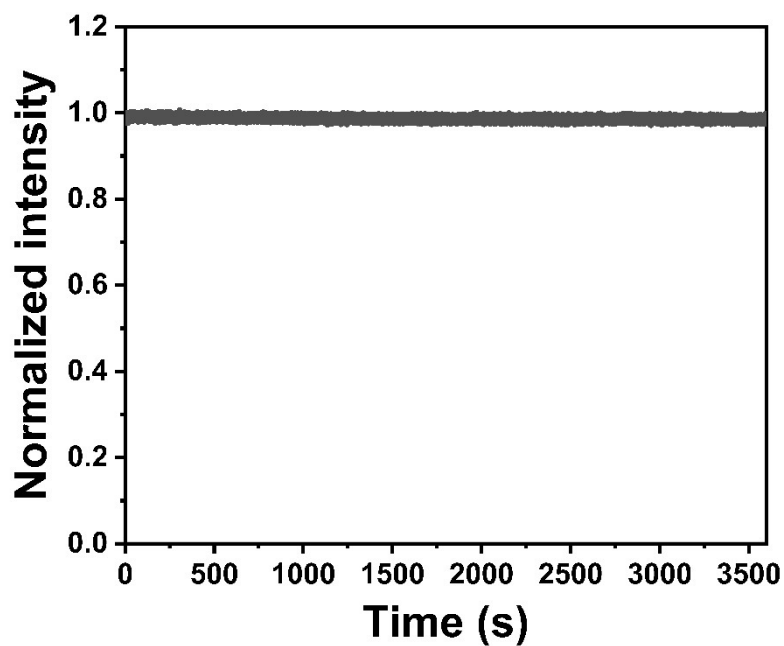

Fig.S2. Plot of normalized fluorescence intensities of the  $\text{Eu}(\text{DPA})_3@Lap$  versus exposure time.

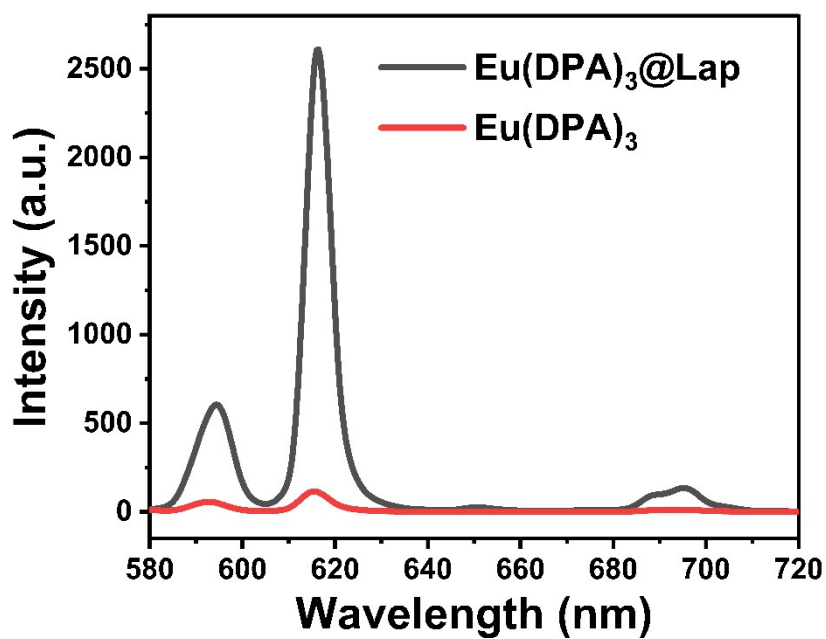

Fig.S3. Fluorescence emission spectrum of  $\text{Eu(DPA)}_3$  and  $\text{Eu(DPA)}_3@Lap$ .

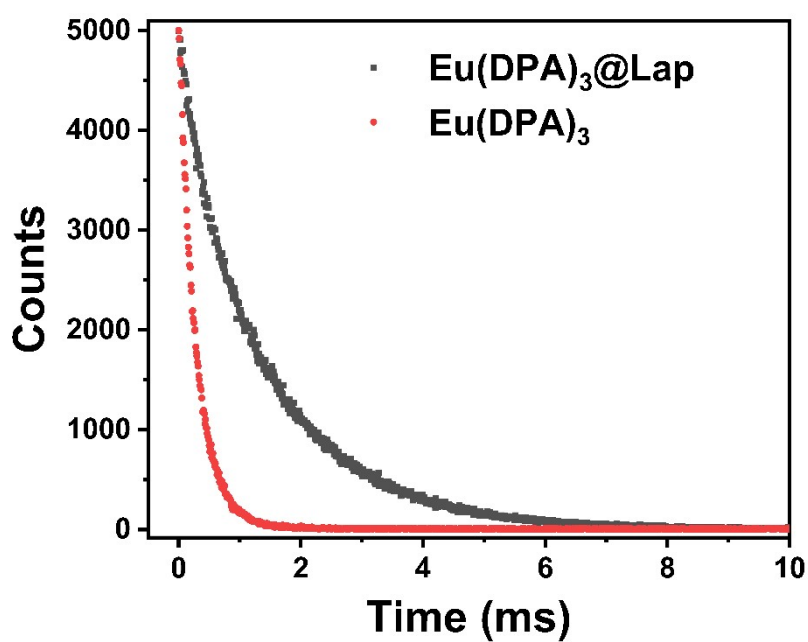

Fig.S4. Fluorescence decays of  $\text{Eu(DPA)}_3$  and  $\text{Eu(DPA)}_3@Lap$ .

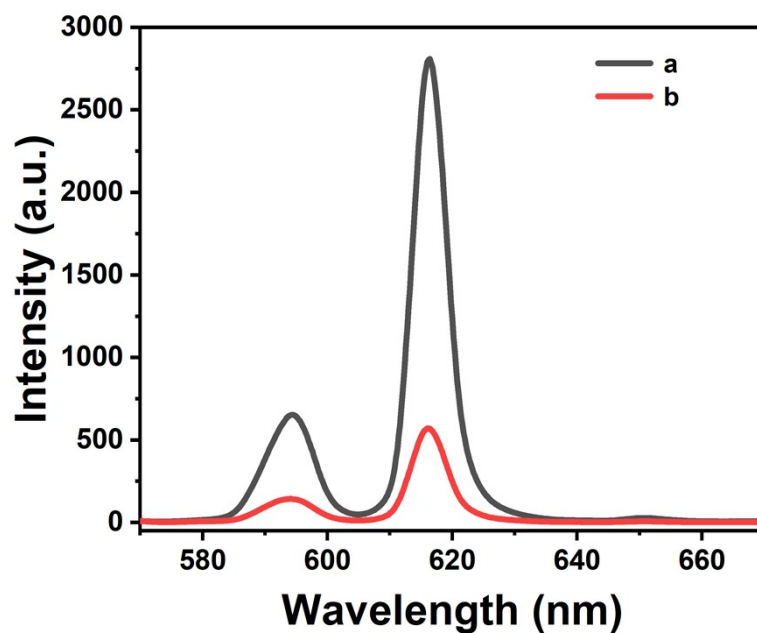

Fig.S5. Luminescence spectra of the  $\text{Eu(DPA)}_3\text{@Lap}$  (a),  $\text{Eu(DPA)}_3\text{@Lap-Cu}^{2+}$  (b).

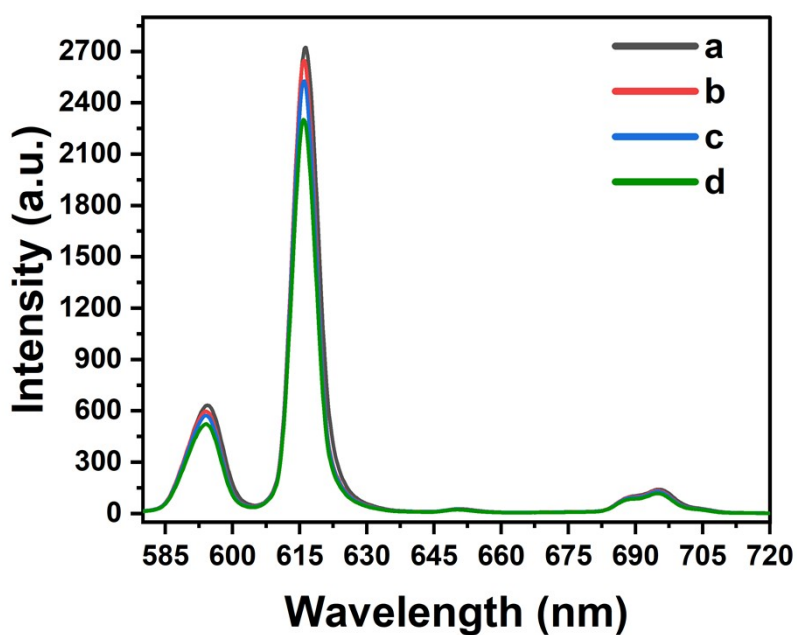

Fig.S6. Luminescence spectra of the  $\text{Eu(DPA)}_3\text{@Lap}$  (a),  $\text{Eu(DPA)}_3\text{@Lap-AChE}$  (b),  $\text{Eu(DPA)}_3\text{@Lap-ATCh}$  (c) and  $\text{Eu(DPA)}_3\text{@Lap-ATCh-AChE}$  (d).

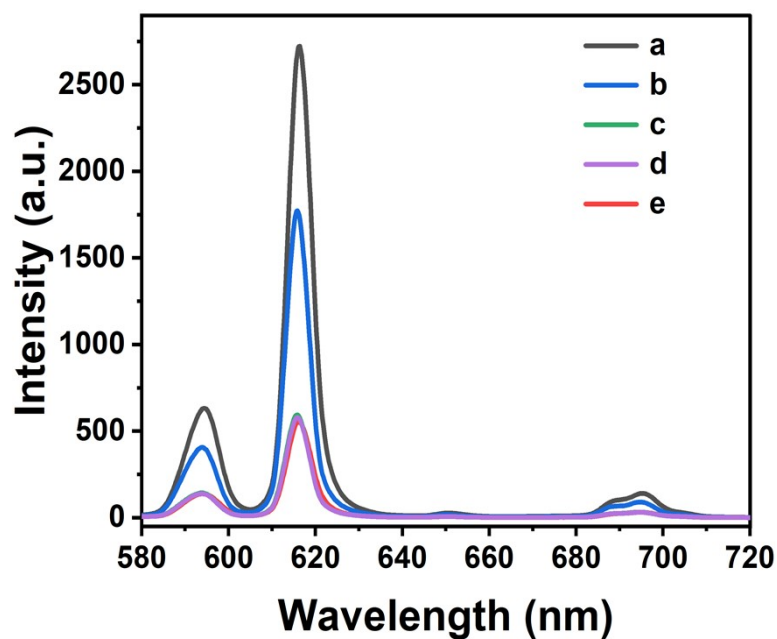

**Fig.S7.** Luminescence spectra of the  $\text{Eu(DPA)}_3\text{@Lap}$  (a),  $\text{Eu(DPA)}_3\text{@Lap-Cu}^{2+}\text{-ATCh-AChE}$  (b),  $\text{Eu(DPA)}_3\text{@Lap-Cu}^{2+}\text{-ATCh}$ (c),  $\text{Eu(DPA)}_3\text{@Lap-Cu}^{2+}\text{-AChE}$ (d) and  $\text{Eu(DPA)}_3\text{@Lap-Cu}^{2+}$  (e).

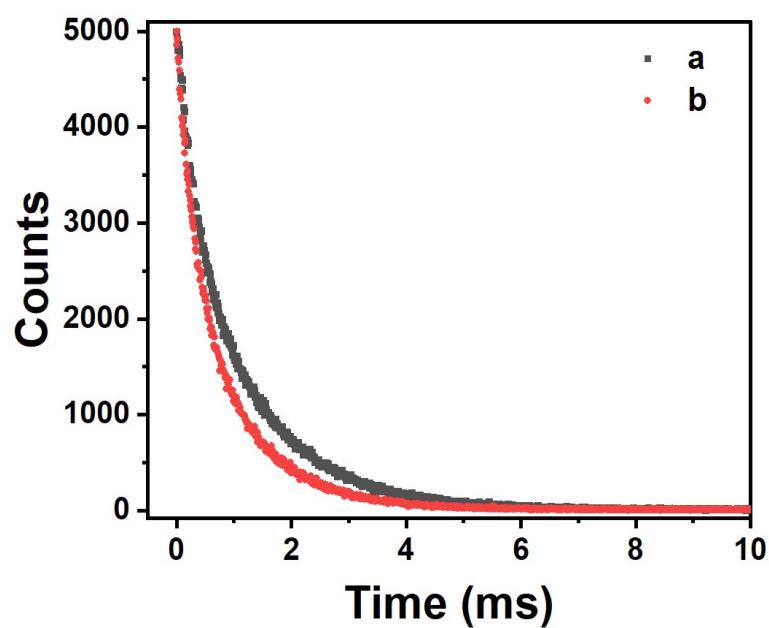

**Fig.S8.** Luminescence lifetimes of the  $\text{Eu(DPA)}_3\text{@Lap-Cu}^{2+}\text{-ATCh-AChE}$  (a) and  $\text{Eu(DPA)}_3\text{@Lap-Cu}^{2+}$  (b).

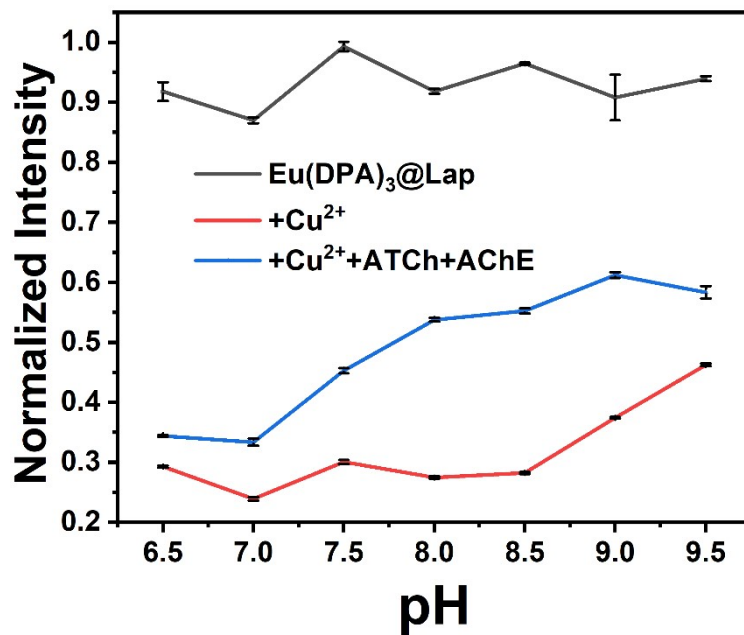

Fig.S9. Fluorescence intensity of the Eu(DPA)<sub>3</sub>@Lap (a), Eu(DPA)<sub>3</sub>@Lap-Cu<sup>2+</sup> (b) and Eu(DPA)<sub>3</sub>@Lap-Cu<sup>2+</sup>-ATCh-AChE (c) in various pH.

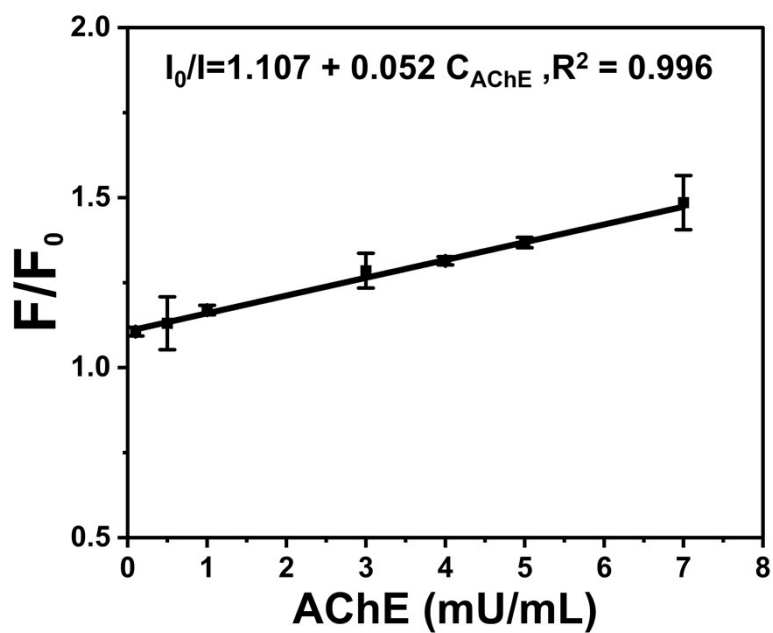

Fig.S10. Fluorescence intensities (presented as  $I_0/I$ ) at 616 nm of the sensing system versus the AChE activities in 2% human serum (HS).

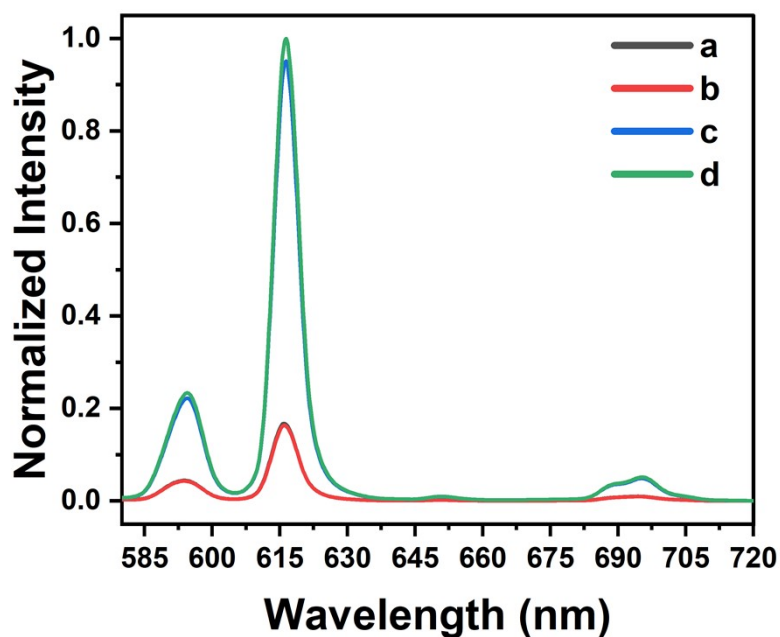

**Fig.S11.** Luminescence spectra of the  $\text{Eu}(\text{DPA})_3@Lap\text{-Cu}^{2+}$  (a),  $\text{Eu}(\text{DPA})_3@Lap\text{-Cu}^{2+}$ - tacrine (b),  $\text{Eu}(\text{DPA})_3@Lap$ - tacrine (c) and  $\text{Eu}(\text{DPA})_3@Lap$  (d).

**Table S1.** Comparison of various detection methods for AChE activity

| Method             | Sensing system                         | LOD<br>(mU/mL) | Linear range<br>(mU/mL) | Ref.      |
|--------------------|----------------------------------------|----------------|-------------------------|-----------|
| Liquid crystal     | 5CB microdroplets                      | 6.6            | 6.6–66000               | 1         |
| Fluorescence       | GQDs@Tb/GMPICP                         | 5              | 5–400                   | 2         |
| Fluorescence       | Perylene probe/MnO <sub>2</sub> NS     | 2.5            | 5-100                   | 3         |
| Fluorescence       | CQDs/AuNCs                             | 1.08           | 0.5–5                   | 4         |
| Colorimetric assay | ATCh/TMB/H <sub>2</sub> O <sub>2</sub> | 0.5            | 2.0-14                  | 5         |
| Colorimetric assay | Au@PDA NPs hydrogel                    | 0.9            | 2.5 – 25                | 6         |
| Fluorescence       | $\text{Eu}(\text{DPA})_3@Lap$          | 0.5            | 1-18                    | This work |

**Table S2.** Results of recovery efficiency in the analysis of human serum samples.

| sample | Spiked (mU/mL) | Found (mU/mL) | Recovery (%) | RSD (%; n=3) |
|--------|----------------|---------------|--------------|--------------|
| 1      | 7              | 7.50 ± 0.14   | 107.1        | 1.9          |
|        | 10             | 9.77 ± 0.10   | 97.7         | 1.0          |
|        | 15             | 15.80 ± 0.37  | 105.3        | 2.4          |
| 2      | 7              | 7.49 ± 0.11   | 107.0        | 1.4          |
|        | 10             | 9.85 ± 0.26   | 98.5         | 2.6          |
|        | 15             | 14.22 ± 0.44  | 94.8         | 3.1          |



## References.

1. Duan R, Hao XL, Li YZ, Li HY (2020) Detection of acetylcholinesterase and its inhibitors by liquid crystal biosensor based on whispering gallery mode. *Sensor Actuat B-Chem* 308:127672
2. Ma RX, Xu M, Liu C, Shi GY, Deng JJ, Zhou TS (2020) Stimulus Response of GQD-sensitized Tb/GMP ICP nanoparticles with dual-responsive ratiometric fluorescence: toward point-of-use analysis of acetylcholinesterase and organophosphorus pesticide poisoning with acetylcholinesterase as a biomarker. *Acs Appl Mater Interfaces* 12:42119-42128
3. Zhang YY, Zhang CY, Chen J, Li YX, Yang MD, Zhou HP, Shahzad SA, Qi H, Yu C, Jiang SC (2017) A real-time fluorescence turn-on assay for acetylcholinesterase activity based on the controlled release of a perylene probe from MnO<sub>2</sub> nanosheets, *J Mater Chem C* 5:4691-4694
4. Suo ZG, Liu XW, Hou XL, Liu Y, Lu JY, Xing FF, Chen YY, Feng LY (2020) Ratiometric assays for acetylcholinesterase activity and organo-phosphorous pesticide based on superior carbon quantum dots and BLGF-protected gold nanoclusters FRET Process. *Chemistryselect* 5:9254-9260
5. Han T, Wang GF (2019) Peroxidase-like activity of acetylcholine-based colorimetric detection of acetylcholinesterase activity and an organophosphorus inhibitor. *J Mater Chem B* 7:2613-2618
6. Zhang JJ, Mou L, Jiang XY (2018) Hydrogels incorporating Au@Polydopamine nanoparticles: robust performance for optical sensing. *Anal Chem* 90:11423-11430.
